# Supplementary material for: Genetic and Nongenetic Components of Stroke Family History: A Population Study of Adopted and Nonadopted Individuals
Source: PubMed Central journal article supplement — J Am Heart Assoc. 2023 Oct 17;12(20):e031566. doi: 10.1161/JAHA.123.031566 (PMC10757525; doi:10.1161/jaha.123.031566), 2023-10-17

# **SUPPLEMENTAL MATERIAL**

**Table S1. Comparison of self-reported family history by sex, stratified by adoption status.**

| <b>Not adopted individuals</b>         | <b>Female<br/>(N=267,550)</b> | <b>Male<br/>(N=222,343)</b> | <b>p</b> |
|----------------------------------------|-------------------------------|-----------------------------|----------|
| Family history of stroke, n (%)        | 77,319 (28.9%)                | 59,627 (26.8%)              | <0.001   |
| Family history of heart disease, n (%) | 127,121 (47.5%)               | 94,870 (42.7%)              | <0.001   |
| <b>Adopted individuals</b>             | <b>Female<br/>(N=3,089)</b>   | <b>Male<br/>(N=2,658)</b>   | <b>p</b> |
| Family history of stroke, n (%)        | 725 (23.5%)                   | 621 (23.4%)                 | 0.949    |
| Family history of heart disease, n (%) | 1,276 (41.3%)                 | 969 (36.5%)                 | <0.001   |

**Figure S1. Associations between self-reported family history illnesses and the stroke PRS with incident stroke stratified by age at baseline in non-adopted individuals.**

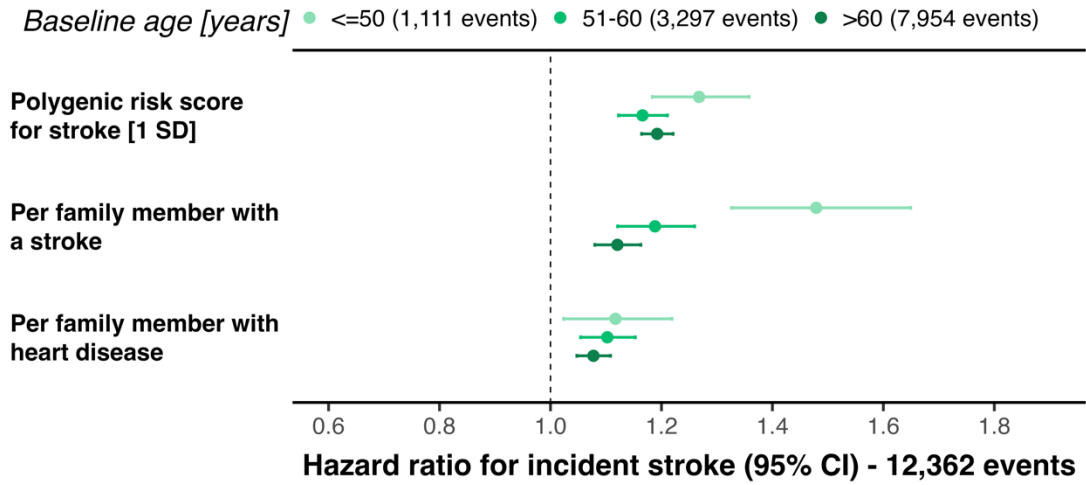

*SD – Standard Deviation; CI – Confidence Interval*

**Figure S2. Associations between self-reported family history illnesses of adopted family members and the stroke PRS with incident stroke stratified by age at baseline in adopted individuals.**

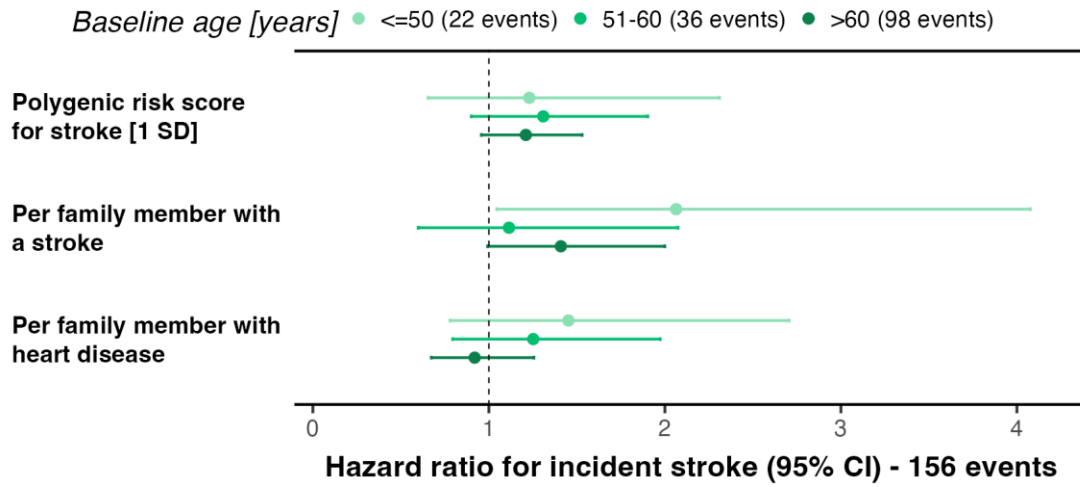

*SD – Standard Deviation; CI – Confidence Interval*

**Figure S3. Associations between self-reported family history illnesses and the stroke PRS with incident stroke stratified by sex in non-adopted individuals.**

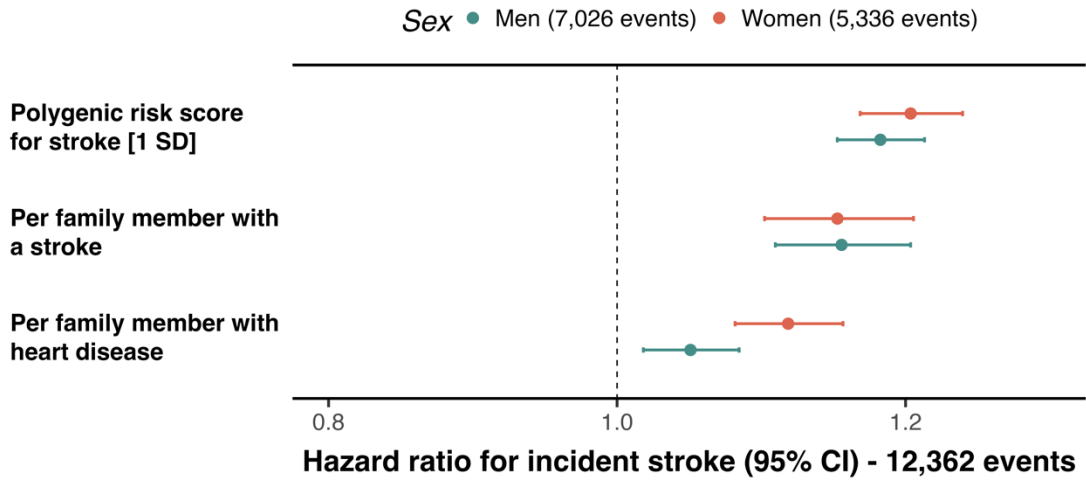

*SD – Standard Deviation; CI – Confidence Interval*

**Figure S4. Associations between self-reported family history illnesses of adopted family members and the stroke PRS with incident stroke stratified by sex in adopted individuals.**

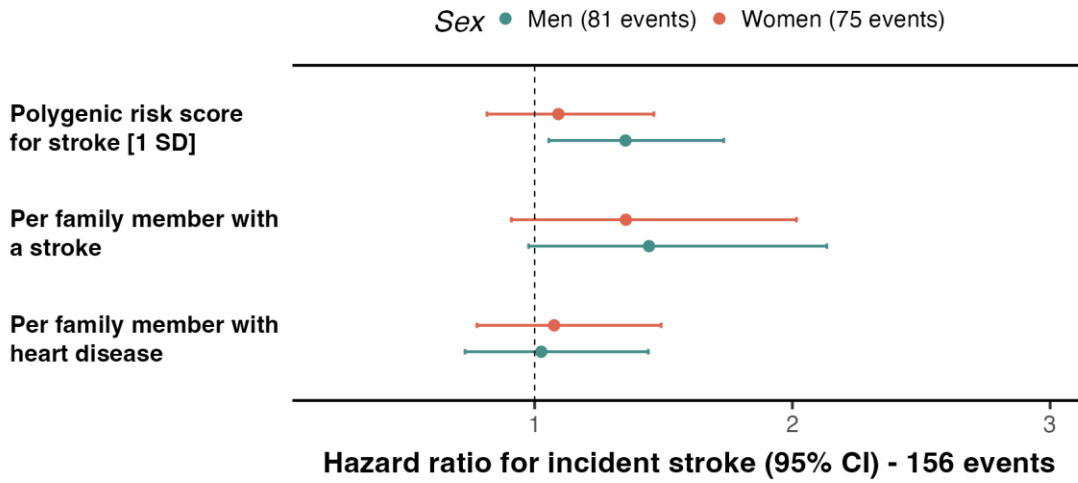

*SD – Standard Deviation; CI – Confidence Interval*

**Figure S5. Associations between self-reported family history illnesses and the stroke PRS with incident stroke in fully adjusted models for cardiovascular risk factors.**

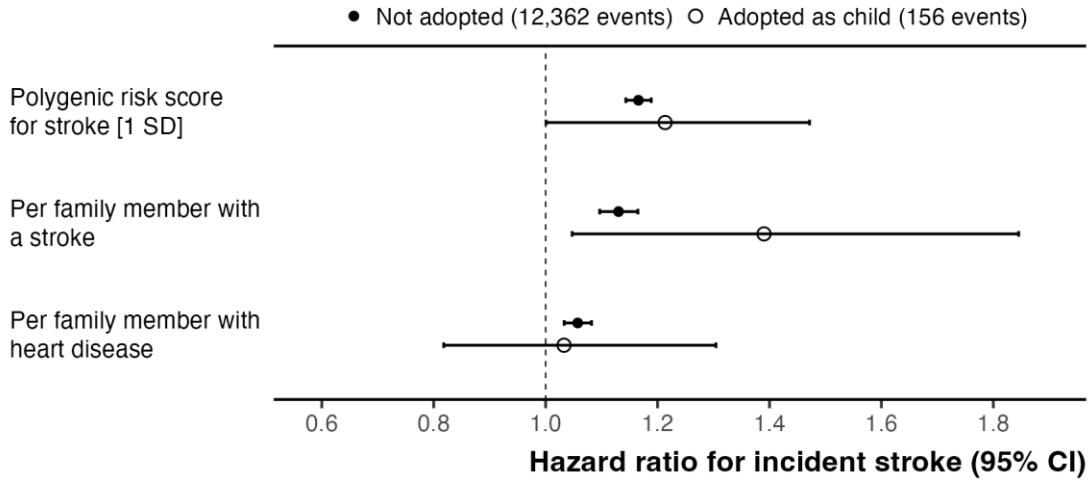

*SD – Standard Deviation; CI – Confidence Interval*

**Figure S6. Associations between self-reported family history illnesses and the stroke PRS with incident stroke in the subpopulation of people with available genetic data and of European genetic ancestry.**

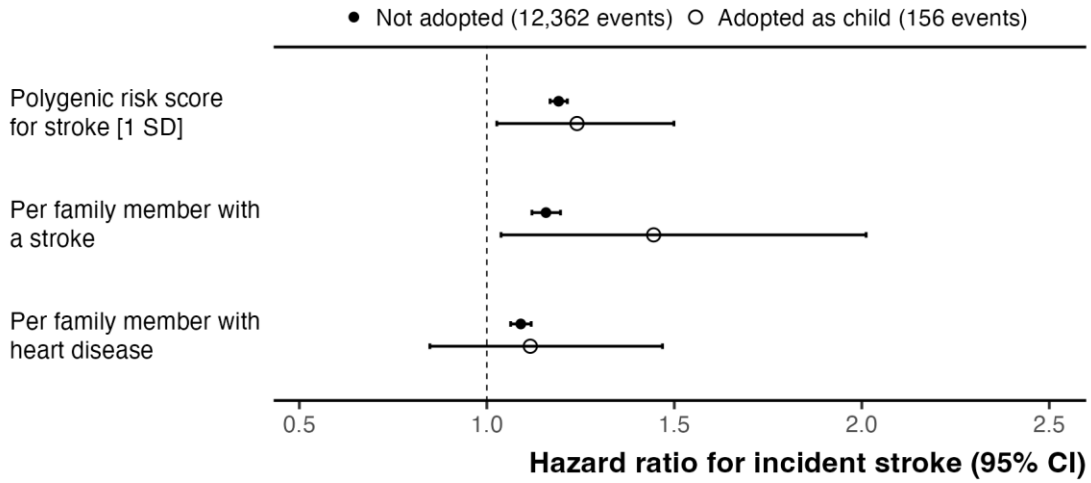

*SD – Standard Deviation; CI – Confidence Interval*



**Figure S7. Associations between self-reported family history illnesses of parents only (without considering siblings) and the stroke PRS with incident stroke.**

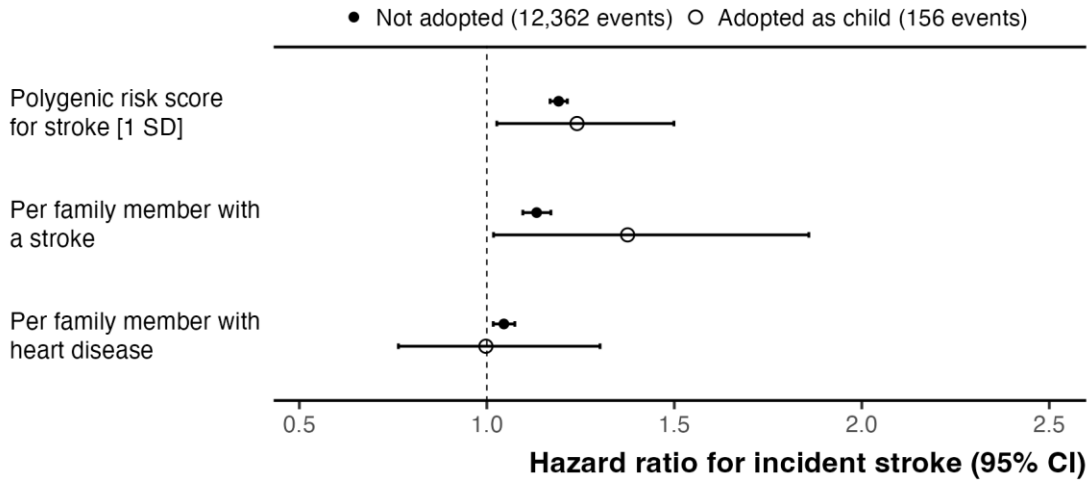

*SD – Standard Deviation; CI – Confidence Interval*

**Figure S8. Associations between self-reported family history of stroke and incident stroke in models adjusted for number of biological and adopted siblings.**

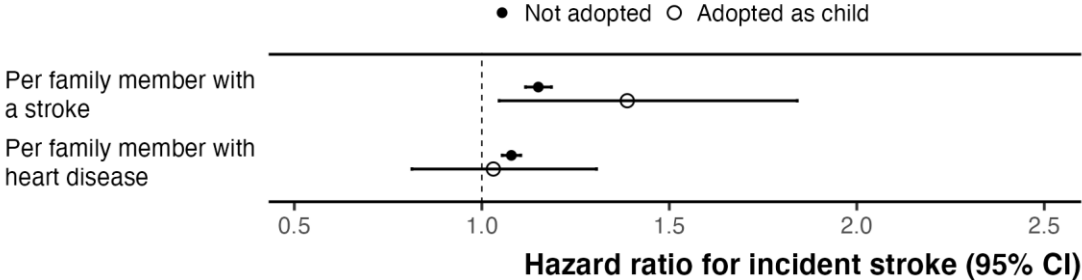

*CI – Confidence Interval*

**Figure S9. Associations between self-reported family history illnesses and the MI PRS with incident MI stratified by age at baseline in non-adopted individuals.**

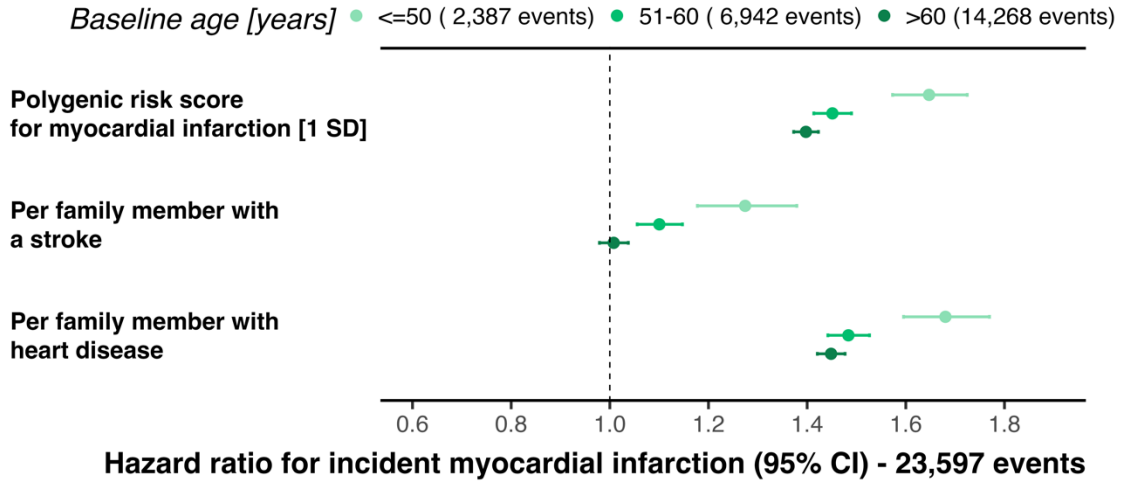

*SD – Standard Deviation; CI – Confidence Interval*

**Figure S10. Associations between self-reported family history illnesses and the MI PRS with incident MI stratified by age at baseline in adopted individuals.**

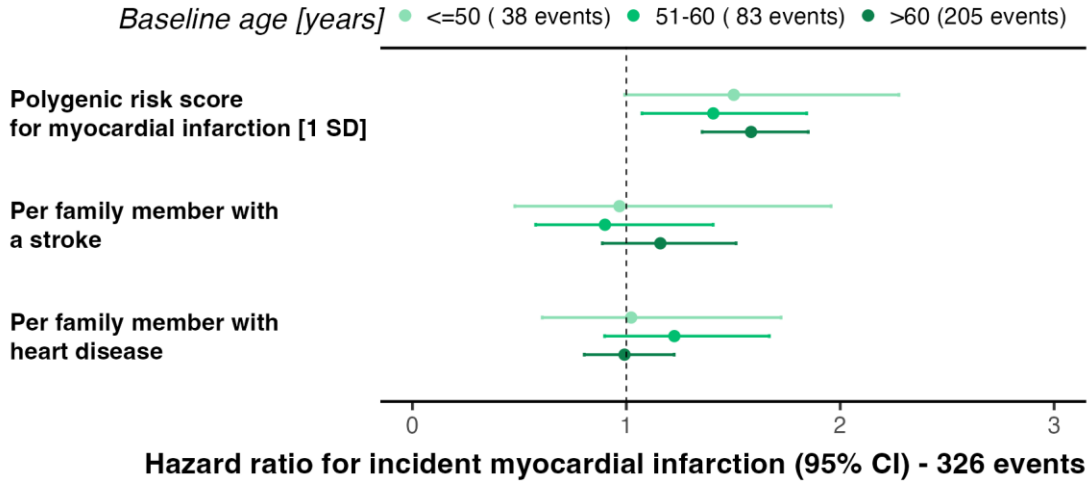

*SD – Standard Deviation; CI – Confidence Interval*

**Figure S11. Associations between self-reported family history illnesses and the MI PRS with incident MI stratified by sex in non-adopted individuals.**

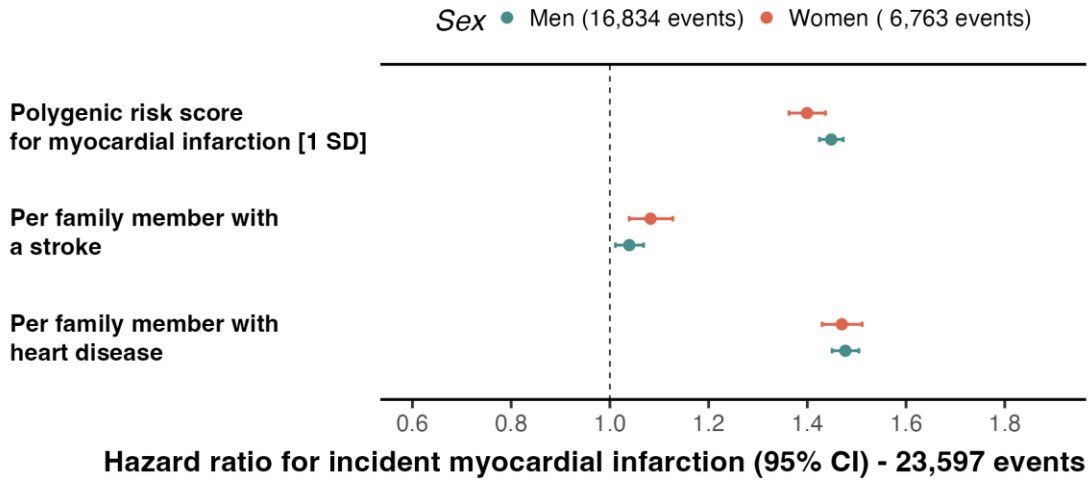

*SD – Standard Deviation; CI – Confidence Interval*

**Figure S12. Associations between self-reported family history illnesses and the MI PRS with incident MI stratified by sex in adopted individuals.**

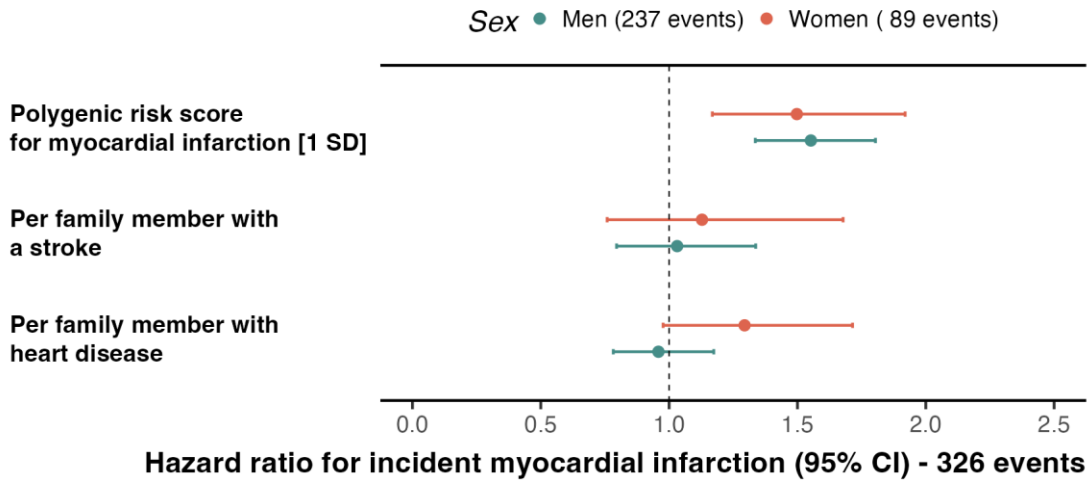

*SD – Standard Deviation; CI – Confidence Interval*

**Figure S13. Associations between self-reported family history illnesses and the MI PRS with incident MI in fully adjusted models for cardiovascular risk factors.**

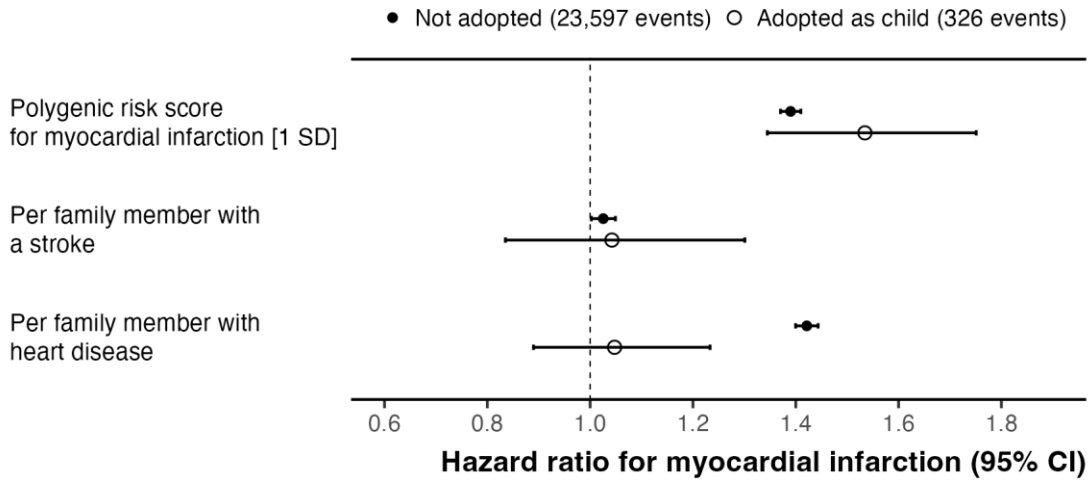

*SD – Standard Deviation; CI – Confidence Interval*

**Figure S14. Associations between self-reported family history illnesses and the MI PRS with incident MI in the subpopulation of people with available genetic data and of European genetic ancestry.**

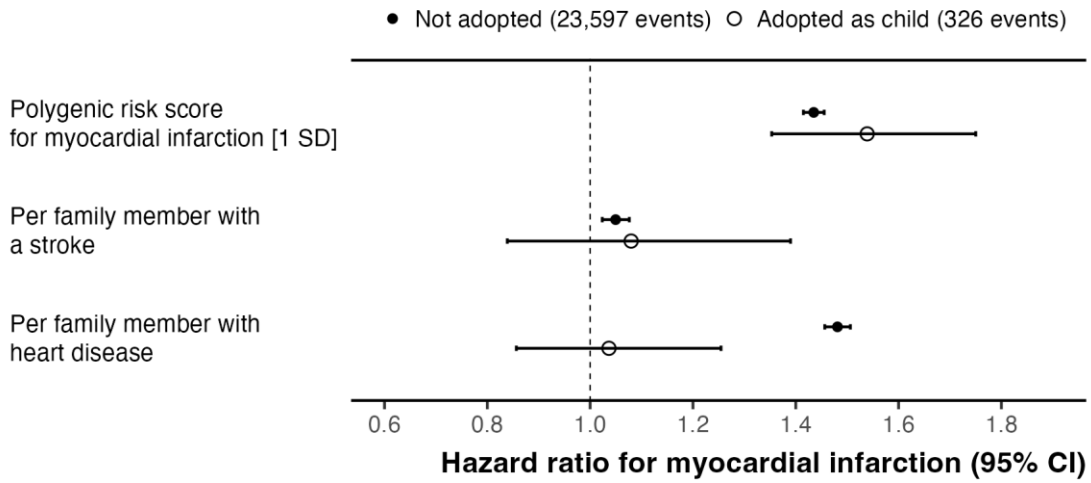

*SD – Standard Deviation; CI – Confidence Interval*



**Figure S15. Associations between self-reported family history illnesses of parents only (without considering siblings) and the MI PRS with incident MI.**

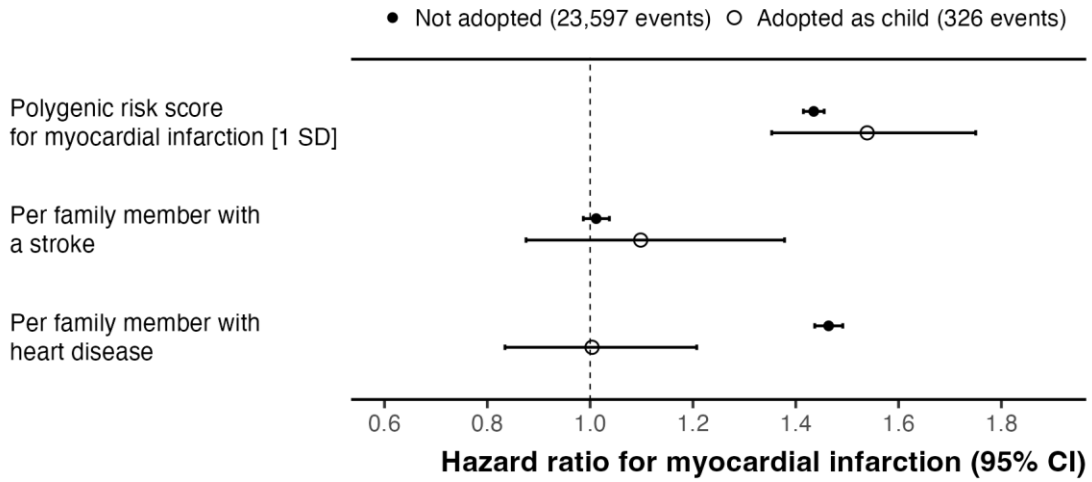

*SD – Standard Deviation; CI – Confidence Interval*

**Figure S16. Associations between self-reported family history of heart disease and incident myocardial infarction in models adjusted for number of biological and adopted siblings.**

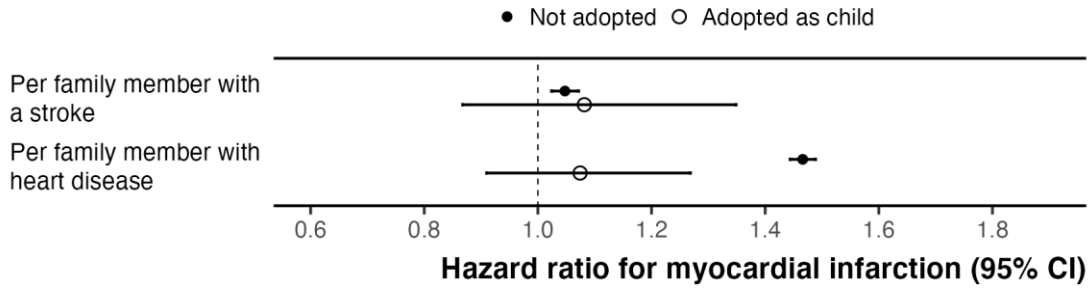

Supplement: JAH3-12-e031566-s001.pdf [file JAH3-12-e031566-s001.pdf]
